# Supplementary material
Source: publisher site journal article supplement (https://www.spandidos-publications.com/5494/downloadSupplementary)

Figure S1. Identification of mouse genotype. Primers WT-F and WT-R was selected to identify WT mice genotype. WT-F and Mut-R was selected to identify delete mice genotype. WT, wild-type; Mut, mutant; F, forward; R, reverse; EGE, Extreme Genome Editing.

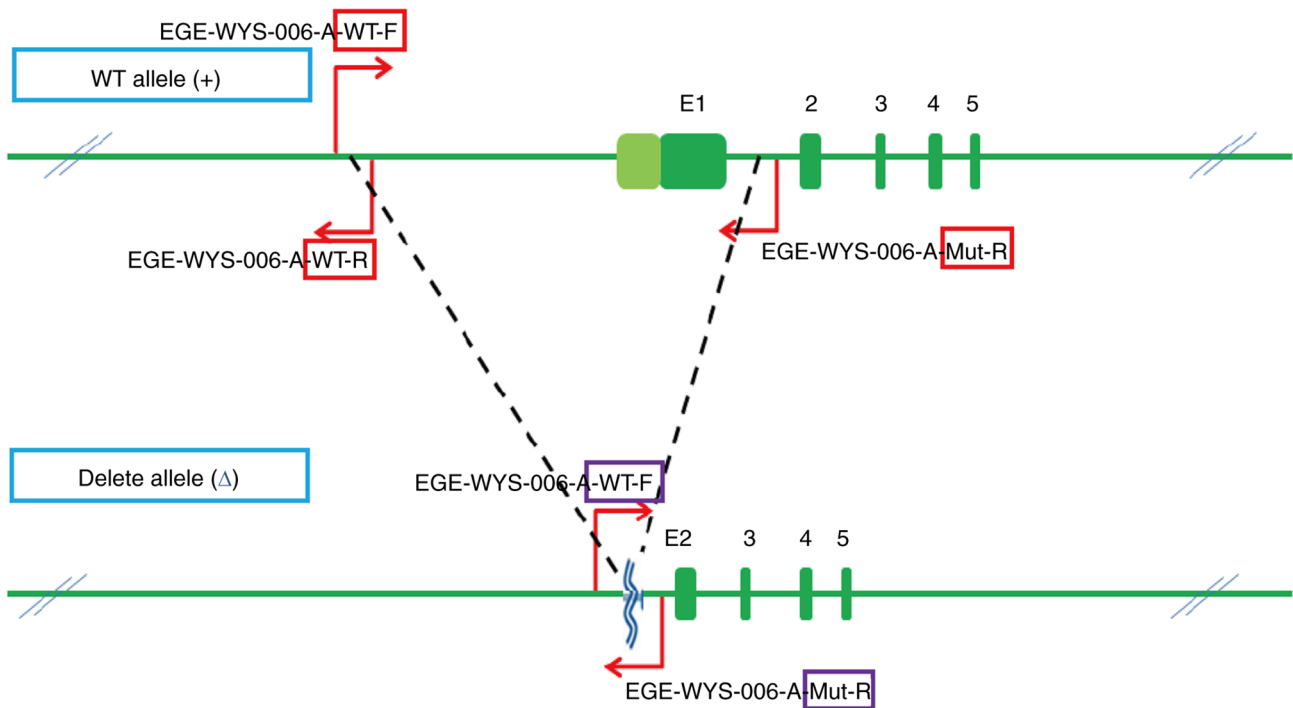

Supplement: Supplementary file 1 [file downloadSupplementary]
